# Supplementary material
Source: PubMed Central journal article supplement (PMC3767470)
Supplement: NIHMS479307-supplement-supplement_1.pdf [file NIHMS479307-supplement-supplement_1.pdf]

929<sup>Q28</sup>**Appendix 1*****Cause of Death***

Survival status was assigned using research-specific mortality files created by the strategic programming group at the Kaiser Permanente Division of Research. The mortality file concatenates data from the SEER program, Kaiser Permanente membership files, California state death certificates, and the Social Security Death Index. It uses probabilistic matching on data elements such as name, date of birth, and social security number to assign mortality status.

Cause of death assignment used physician medical record review; the reviewer was blinded to the surveillance status of the patient. In-hospital deaths were attributed to

esophageal cancer if the patient had documented widely metastatic disease without another apparent cause of<sup>Q29</sup> death or if, after review, the death was reported to result from a cancer-related treatment (eg, sepsis during chemotherapy). Out-of-hospital deaths were attributed to esophageal cancer using data from recent admissions and outpatient notes in the electronic medical record. For example, if a patient with advanced cancer was discharged home on hospice, a diagnosis of a cancer-related death was assigned. Patients with deaths attributable to other causes (eg, stroke, myocardial infarction, chronic obstructive pulmonary disease) or patients in whom a cause of death was unclear were assigned as non-cancer-related deaths.

987  
988  
989  
990  
991  
992  
993  
994  
995  
996  
997  
998  
999  
1000  
1001  
1002  
1003  
1004  
1005  
1006  
1007  
1008  
1009  
1010  
1011  
1012  
1013  
1014  
1015  
1016  
1017  
1018  
1019  
1020  
1021  
1022  
1023  
1024  
1025  
1026  
1027  
1028  
1029  
1030  
1031  
1032  
1033  
1034  
1035  
1036  
1037  
1038  
1039  
1040  
1041  
1042  
1043

**Supplementary Table 1.** Distribution of Cases and Controls by Year of Cancer Diagnosis

| Year of case cancer diagnosis | Cases | Controls |
|-------------------------------|-------|----------|
| 1998-1999                     | 5     | 15       |
| 2000-2001                     | 9     | 22       |
| 2002-2003                     | 15    | 40       |
| 2004-2005                     | 3     | 8        |
| 2006-2007                     | 6     | 15       |

986
